# Supplementary material for: Experimental Parameters Influence the Observed Antimicrobial Response of Oak Wood (Quercus petraea)
Source: MDPI journal article supplement (doi:10.3390/antibiotics9090535), 2020-08-24
Supplement: s1 [file s1]

Supplementary material

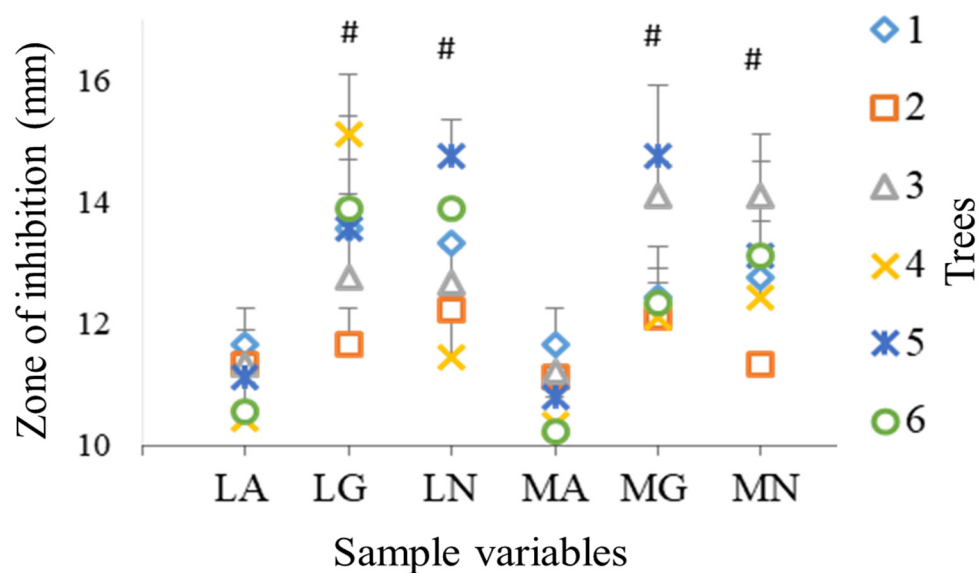

**Figure S1.** Effect sterilization on the antimicrobial activity of different trees against *Acinetobacter baumannii*. Y axis is the mean  $\pm$  standard deviation ( $n=3$ ) of zone of inhibition (mm) including the diameter of wooden discs (10 mm); LA = Laser cut autoclaved; LG = Laser cut gamma irradiated; LN = Laser cut non-sterilized; MA = Manual cut autoclaved; MG = Manual cut gamma irradiated; MN = Manual cut non-sterilized; 1 - 6 number of trees; #  $p < 0.1$ .

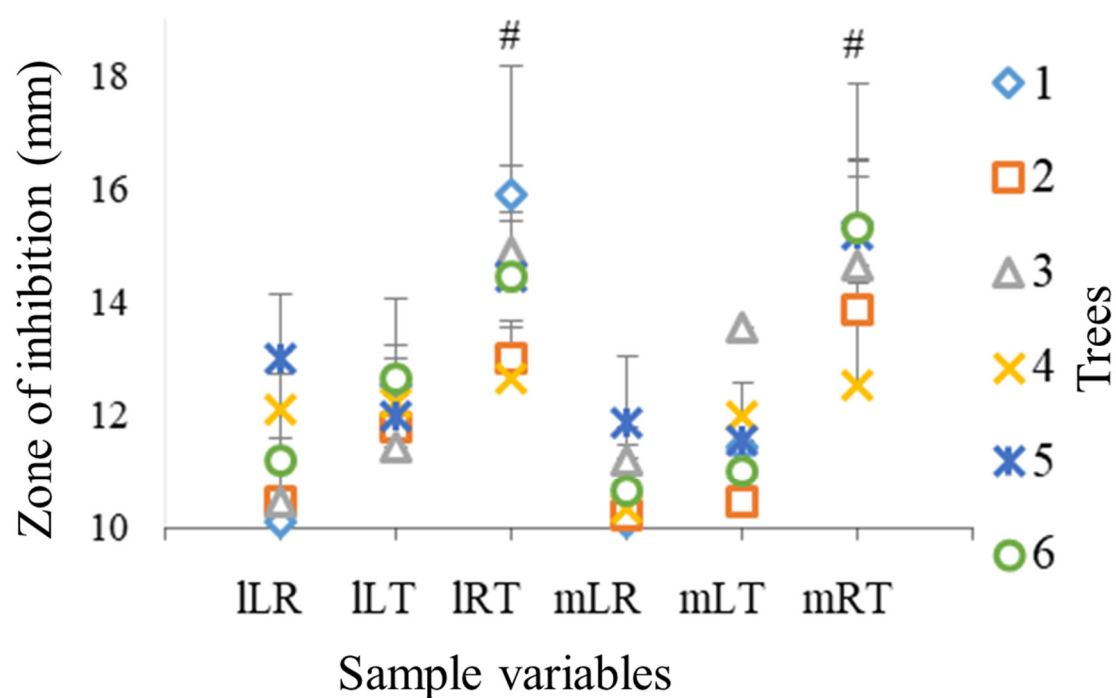

**Figure S2.** Effect cutting planes on the antimicrobial activity of 6 trees against *Acinetobacter baumannii*. Y axis is the value of zone of inhibition including the diameter of wooden discs ( $9.95 \pm 0.1$  mm). ILR = Laser cut radial plane samples; ILT = Laser cut tangential plane samples; IRT = Laser cut transversal plane samples; mLR = Manual cut radial plane samples; mLT = Manual cut tangential plane samples; mRT = Manual cut transversal plane samples; 1 - 6 number of trees; #  $p < 0.1$ .
